# Supplementary material
Source: publisher site journal article supplement (https://www.degruyterbrill.com/publication/journal_key/SATS/downloadAsset/SATS_SATS_Book%20Review%20Guidelines.pdf)

# SATS - Northern European Journal of Philosophy

## Book Review Guidelines

Our book review section particularly aims to engage with and provide a venue for books in English that contextualize philosophy or put philosophy to work beyond specialised philosophical discussions by bringing it into dialogue and fruitful exchange with other fields, including, but not limited to, literature studies, media studies, anthropology, history, theology sociology, the natural sciences, computer science or STS studies.

We very much welcome reviews of books that are published outside of the big university presses and which, in line with SATS' interdisciplinary vision, in novel ways use philosophy to deal with and address the concerns of contemporary societies. As a Northern European journal rooted in Scandinavia, we are also interested in reviews of books that expound on ideas and thinkers related to a Scandinavian context.

## Formalities

A book review in *SATS* should consist of 1500-2500 words.

Reviews will undergo editorial review, but will not undergo blind peer-review.

Here are the three main ways a book review may be brought into our journal:

- Academics may contact SATS with a book they would like to review through [arman.niknam@gmail.com](mailto:arman.niknam@gmail.com) or [mf.n.mpp@cbs.dk](mailto:mf.n.mpp@cbs.dk). Reviewers should state why they want to review the book and how it fits into SATS' aims.

- Publishers or authors may make us aware of a book they would like to have reviewed.

- The book review editors of *SATS* commission relevant reviews through their own network within academia.

Reviewers should submit their review through SATS' homepage within 5 months from receiving the book. It will then be reviewed by the journal's book review editors and reviewers may be asked to make some changes. When the final version has been accepted, it will be made available ahead of print on SATS' homepage and published in the regular issue.

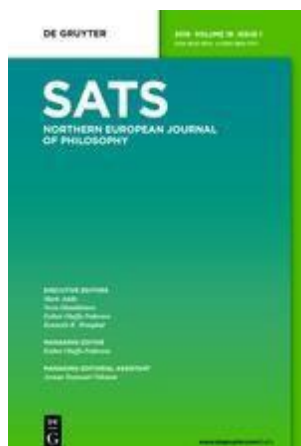

Supplement: Supplementary file 1 [file SATS_SATS_Book%20Review%20Guidelines.pdf]
